# Supplementary material for: Experimental study of carbides in the Ti–Cr–C system
Source: Springer Nature journal article supplement (doi:10.1007/s10853-019-03810-3), 2019-07-03
Supplement: MOESM1 [file 16880330]

TiC

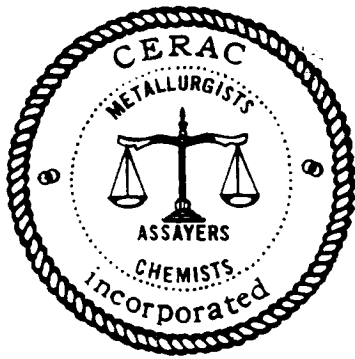

**CERAC** incorporated

# Certificate of Analysis

This is the analysis of the starting material for your TiC piece PO# 89031

MATERIAL T-1151 TITANIUM CARBIDE, TiC LOT NUMBER 27016-A-2  
-325 mesh  
Typically 99.5% pure

### 1. SPECIFIC ANALYSIS OR PROPERTY

Fisher size = 3.85 microns  
C total (Theo.) = 20.05%  
C total (Found) = 19.34%  
C free (Found) = 0.4%

### 2. SPECTROGRAPHIC ANALYSIS

|    |      |    |      |
|----|------|----|------|
| Al | 0.1% | Fe | 0.1% |
| Ca | 0.01 | Mg | 0.01 |
| Cr | 0.03 | Ni | 0.04 |
| Cu | 0.05 | Si | 0.1  |

### 3. X-RAY DIFFRACTION ANALYSIS (if applicable)

TiC matches PDF 31-400, Cubic.

FILM NUMBER D-4602

**CERAC**, incorporated

Mailing Address ... P.O. Box 1178, Milwaukee, WI 53201  
Plant/Laboratory... 407 N. 13th St., Milwaukee, WI 53233

*Ronald L. Coates*

by Dr. Ronald L. Coates, QC 083088 cm
