# Supplementary material for: Experimental study of carbides in the Ti–Cr–C system
Source: Springer Nature journal article supplement (doi:10.1007/s10853-019-03810-3), 2019-07-03
Supplement: MOESM2 [file 16880330]

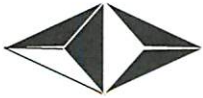

## CERTIFICATE OF ANALYSIS

|               |                         |
|---------------|-------------------------|
| SUPPLIER      | F. W. Winter Inc. & Co. |
| Date          | 06/18/12                |
| Sales Order # | 971536                  |
| Item #        | CRC-C2-170X250          |
| Lot #         | 1114-2F27F              |
| Material      | Cr Carbide C2 Grade     |

|               |                            |
|---------------|----------------------------|
| CUSTOMER      | Geller Microanalytical Lan |
| Shipped To    | Same                       |
| Customer PO # | Sample                     |
| Customer Code | -                          |
| Packing       | envelope                   |
| Size          | 140 x 325 mesh             |

### CHEMICAL ANALYSIS

| ELEMENT | wt. % |
|---------|-------|
| Cr*     | 86.52 |
| C       | 13.28 |
| Si      | 0.007 |
| Fe      | 0.1   |
|         |       |
|         |       |
|         |       |
|         |       |
|         |       |
|         |       |
|         |       |
|         |       |
|         |       |
|         |       |

### SIZE DISTRIBUTION

| SIZE      | %    |
|-----------|------|
| +140 mesh | 0.0  |
| +170 mesh | 0.18 |
| +230 mesh | 36.7 |
| +270 mesh | 68.3 |
| +325 mesh | 85.4 |
| -325 mesh | 14.6 |
|           |      |
|           |      |
|           |      |
|           |      |
|           |      |
|           |      |
|           |      |
|           |      |

\*Gas Free Basis

### OTHER ITEMS

|  |
|--|
|  |
|--|

| Atom | Wt%   | To | At%   | Vol%  |
|------|-------|----|-------|-------|
| Cr   | 86.52 |    | 60.04 | 70.30 |
| C    | 13.28 |    | 39.89 | 29.61 |
| Si   | 0.01  |    | 0.01  | 0.02  |
| Fe   | 0.10  |    | 0.06  | 0.07  |

  
 F. W. Winter Inc. & Co.
